# Supplementary figures and images for: Psychometric evaluation of a visual analog scale for the assessment of anxiety
Source: Springer Nature journal article supplement (doi:10.1186/1477-7525-8-57), 2010-01-01

*Note how anxious (on average) you felt over the past 24 hours with a mark (|) on the line below.*

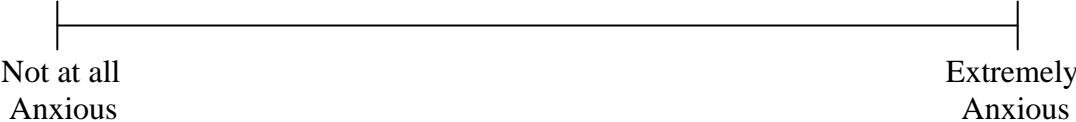

Supplement: 12955_2009_680_MOESM1_ESM.pdf [file 12955_2009_680_MOESM1_ESM.pdf]
